# Supplementary material for: The cervical microbiota of Hispanics living in Puerto Rico is nonoptimal regardless of HPV status
Source: PubMed Central journal article supplement (PMC10469956; doi:10.1128/msystems.00357-23), 2023-08-03
Supplement: msystems.00357-23-s0009.pdf [file msystems.00357-23-s0009.pdf]

**Table S1.** Summary of sequences and ASV before and after rarefaction.

|           | <b>Parameters</b>  | <b>Not rarefied</b> | <b>Rarefied</b> |
|-----------|--------------------|---------------------|-----------------|
| Sequences | N samples          | 337                 | 333             |
|           | Sum seqs           | 8,865,727           | 590,409         |
|           | Mean seqs          | 26,308              | 1,773           |
|           | Sd seqs            | 20,059              | -               |
|           | Max seqs/sample    | 80,253              | 1,773           |
|           | Min seqs/sample    | 187                 | 1,773           |
| ASVs      | Sum ASVs           | 10,262              | 6,581           |
|           | Mean ASVs          | 59                  | 45              |
|           | Sd ASVs            | 90                  | 70              |
|           | Max ASVs/sample    | 720                 | 527             |
|           | Min ASVs/sample    | 4                   | 2               |
| Species   | Sum Species        | 1,023               | 805             |
|           | Mean Species       | 30                  | 21              |
|           | Sd Species         | 35                  | 28              |
|           | Max Species/sample | 249                 | 188             |
|           | Min Species/sample | 1                   | 1               |

**Table S2.** Prevalence of HPV genotypes among women groups.

| HPV type | Non pregnant<br>(N=151) | Pregnant<br>(N=27) | Menopause<br>(N=42) | TOTAL<br>(N=220) | <i>P value &amp;</i>                 |
|----------|-------------------------|--------------------|---------------------|------------------|--------------------------------------|
| HR51     | 44 (29.1%)              | 8 (29.6%)          | 17 (40.5%)          | 69 (31.4%)       | <i>0.378</i>                         |
| HR16     | 33 (21.9%)              | 5 (18.5%)          | 8 (19.0%)           | 46 (20.9%)       | <i>0.903</i>                         |
| HR33     | 24 (15.9%)              | 5 (18.5%)          | 8 (19.0%)           | 37 (16.8%)       | <i>0.818</i>                         |
| HR52     | 21 (13.9%)              | 7 (25.9%)          | 4 (9.5%)            | 32 (14.5%)       | <i>0.159</i>                         |
| HR56     | 24 (15.9%)              | 3 (11.1%)          | 5 (11.9%)           | 32 (14.5%)       | <i>0.798</i>                         |
| HR66     | 22 (14.6%)              | 0 (0%)             | 7 (16.7%)           | 29 (13.2%)       | <i>0.060</i>                         |
| HR45     | 14 (9.3%)               | 1 (3.7%)           | 1 (2.4%)            | 16 (7.3%)        | <i>0.313</i>                         |
| HR35     | 10 (6.6%)               | 2 (7.4%)           | 3 (7.1%)            | 15 (6.8%)        | <i>1.000</i>                         |
| HR68     | 8 (5.3%)                | 2 (7.4%)           | 5 (11.9%)           | 15 (6.8%)        | <i>0.236</i>                         |
| HR39     | 9 (6.0%)                | 1 (3.7%)           | 2 (4.8%)            | 12 (5.5%)        | <i>1.000</i>                         |
| HR58     | 6 (4.0%)                | 1 (3.7%)           | 4 (9.5%)            | 11 (5.0%)        | <i>0.338</i>                         |
| HR59     | 3 (2.0%)                | 0 (0%)             | 5 (11.9%)           | 8 (3.6%)         | <i>0.024 (P<sub>adj</sub>=0.272)</i> |
| HR31     | 1 (0.7%)                | 0 (0%)             | 4 (9.5%)            | 5 (2.3%)         | <i>0.008 (P<sub>adj</sub>=0.173)</i> |
| HR18     | 2 (1.3%)                | 0 (0%)             | 0 (0%)              | 2 (0.9%)         | <i>1.000</i>                         |
| LR53     | 39 (25.8%)              | 3 (11.1%)          | 8 (19.0%)           | 50 (22.7%)       | <i>0.217</i>                         |
| LR74     | 16 (10.6%)              | 3 (11.1%)          | 3 (7.1%)            | 22 (10.0%)       | <i>0.831</i>                         |
| LR44     | 8 (5.3%)                | 0 (0%)             | 1 (2.4%)            | 9 (4.1%)         | <i>0.659</i>                         |
| LR6      | 7 (4.6%)                | 0 (0%)             | 1 (2.4%)            | 8 (3.6%)         | <i>0.740</i>                         |
| LR70     | 5 (3.3%)                | 0 (0%)             | 1 (2.4%)            | 6 (2.7%)         | <i>1.000</i>                         |
| LR54     | 3 (2.0%)                | 0 (0%)             | 1 (2.4%)            | 4 (1.8%)         | <i>1.000</i>                         |
| LR40     | 2 (1.3%)                | 0 (0%)             | 0 (0%)              | 2 (0.9%)         | <i>1.000</i>                         |
| LR19     | 1 (0.7%)                | 0 (0%)             | 0 (0%)              | 1 (0.5%)         | <i>1.000</i>                         |
| LR43     | 1 (0.7%)                | 0 (0%)             | 0 (0%)              | 1 (0.5%)         | <i>1.000</i>                         |

& Fisher's Exact Test. P value adjustment with "False Discovery Rate" method

**Table S3.** Maaslin detailed results. It shows each of the taxa is significantly associated with a particular variable. It shows the model coefficient, the standard error, the number of samples, the number of samples with at least one sequence for a particular taxon, the P-value, and the adjusted P-value.

| Feature                           | metadata | value    | coef   | stderr | N   | N.not.0 | P-value & | Padj. & |
|-----------------------------------|----------|----------|--------|--------|-----|---------|-----------|---------|
| <i>Prevotella</i>                 | pH       | pH       | 1.528  | 0.230  | 294 | 115     | 4.8E-10   | 1.8E-07 |
| <i>Parvimonas</i>                 | pH       | pH       | 0.671  | 0.133  | 294 | 41      | 1.3E-06   | 2.3E-04 |
| <i>Sneathia</i>                   | pH       | pH       | 1.283  | 0.275  | 294 | 89      | 6.4E-06   | 7.9E-04 |
| <i>Clostridium</i>                | pH       | pH       | 0.975  | 0.214  | 294 | 67      | 1.1E-05   | 1.0E-03 |
| <i>Dialister</i>                  | pH       | pH       | 0.550  | 0.130  | 294 | 53      | 3.9E-05   | 2.7E-03 |
| <i>Prevotella buccalis</i>        | pH       | pH       | 0.857  | 0.204  | 294 | 58      | 4.4E-05   | 2.7E-03 |
| <i>Porphyromonas uenonis</i>      | pH       | pH       | 0.540  | 0.137  | 294 | 30      | 1.2E-04   | 6.3E-03 |
| <i>Atopobium vaginae</i>          | Age      | Age      | -1.378 | 0.367  | 294 | 106     | 2.4E-04   | 1.1E-02 |
| <i>Megasphaera oral taxon 841</i> | pH       | pH       | 0.860  | 0.248  | 294 | 73      | 7.0E-04   | 2.9E-02 |
| <i>Peptoniphilus lacrimalis</i>   | pH       | pH       | 0.353  | 0.105  | 294 | 32      | 9.6E-04   | 3.3E-02 |
| <i>Gardnerella vaginalis</i>      | pH       | pH       | 1.201  | 0.358  | 294 | 166     | 1.0E-03   | 3.3E-02 |
| <i>Atopobium vaginae</i>          | Group    | Pregnant | -3.017 | 0.904  | 294 | 106     | 1.1E-03   | 3.3E-02 |
| <i>Atopobium vaginae</i>          | pH       | pH       | 0.884  | 0.270  | 294 | 106     | 1.3E-03   | 3.8E-02 |
| <i>Prevotella bivia</i>           | pH       | pH       | 0.630  | 0.201  | 294 | 68      | 2.0E-03   | 5.0E-02 |

& Fisher's Exact Test. P value adjustment with "False Discovery Rate" method

**Table S4.** Distribution of CST on cervical lesions status, only among non-pregnant women

|             | Cervical Lesion &&  |                    | TOTAL<br>(N=196) | <i>P value &amp;&amp;</i> |
|-------------|---------------------|--------------------|------------------|---------------------------|
|             | Negative<br>(N=112) | Positive<br>(N=69) |                  |                           |
| <b>CST1</b> |                     |                    |                  | <i>0.039</i>              |
| I           | 25 (22.3%)          | 6 (8.7%)           | 34 (17.3%)       |                           |
| II          | 1 (0.9%)            | 4 (5.8%)           | 6 (3.1%)         |                           |
| III         | 48 (42.9%)          | 30 (43.5%)         | 83 (42.3%)       |                           |
| IV          | 36 (32.1%)          | 26 (37.7%)         | 68 (34.7%)       |                           |
| V           | 2 (1.8%)            | 3 (4.3%)           | 5 (2.6%)         |                           |

& Positive samples includes the HGSIL or LGSIL

&& Fisher's Exact Test

**Table S5.** Distribution of CST on cervical HPV by HPV risk types, only among non-pregnant women

|             | Cervical HPV type by risk  |                                 |                              |                          |                      |
|-------------|----------------------------|---------------------------------|------------------------------|--------------------------|----------------------|
|             | <b>Negative<br/>(N=44)</b> | <b>Only_low_risk<br/>(N=17)</b> | <b>High_Risk<br/>(N=133)</b> | <b>TOTAL<br/>(N=196)</b> | <b>P value &amp;</b> |
| <b>CST1</b> |                            |                                 |                              |                          | <i>0.039</i>         |
| I           | 9 (20.5%)                  | 4 (23.5%)                       | 21 (15.8%)                   | 34 (17.3%)               |                      |
| II          | 0 (0%)                     | 2 (11.8%)                       | 4 (3.0%)                     | 6 (3.1%)                 |                      |
| III         | 15 (34.1%)                 | 7 (41.2%)                       | 59 (44.4%)                   | 83 (42.3%)               |                      |
| IV          | 19 (43.2%)                 | 2 (11.8%)                       | 47 (35.3%)                   | 68 (34.7%)               |                      |
| V           | 1 (2.3%)                   | 2 (11.8%)                       | 2 (1.5%)                     | 5 (2.6%)                 |                      |

& Fisher's Exact Test

**Table S6.** Comparison of Hispanic women CSTs between Puerto Rico and the USA

| CST | Prevalence among Hispanic (%) |            |                      |
|-----|-------------------------------|------------|----------------------|
|     | PR (N=196)                    | USA (N=97) | <i>P value &amp;</i> |
| I   | 17.3                          | 14.4       | <i>0.616</i>         |
| II  | 3.1                           | 7.2        | <i>0.132</i>         |
| III | 42.3                          | 36.1       | <i>0.315</i>         |
| IV  | 34.7                          | 38.1       | <i>0.881</i>         |
| V   | 2.6                           | 4.1        | <i>0.485</i>         |

& Fisher's Exact Test

**Table S7.** Changes of cervical lesion diagnosis in relationship with changes in the CST in 2 visits from 4 to 16 months apart.

| Variable                | Visit1-Visit2       |                 |                 |         | <i>P value &amp;</i> |
|-------------------------|---------------------|-----------------|-----------------|---------|----------------------|
|                         | lac_dom-<br>lac_dom | lac_dom-<br>div | div-<br>lac_dom | div-div |                      |
| <b>Cervical lesions</b> |                     |                 |                 |         | <i>0.991</i>         |
| HGSIL_HGSIL             | 2                   | 0               | 0               | 0       |                      |
| HGSIL_LGSIL             | 1                   | 1               | 0               | 0       |                      |
| HGSIL_Negative          | 3                   | 1               | 1               | 3       |                      |
| LGSIL_LGSIL             | 2                   | 0               | 0               | 0       |                      |
| LGSIL_Negative          | 3                   | 1               | 1               | 1       |                      |
| Negative_LGSIL          | 1                   | 0               | 1               | 0       |                      |
| Negative_Negative       | 7                   | 2               | 2               | 5       |                      |

& Fisher's Exact Test

**Table S8.** Changes of HPV status (any HPV type) diagnosis in relationship with changes in the CST in 2 visits from 4 to 16 months apart.

| Any HPV type      | Visit1-Visit2       |                 |                |         | <i>P value &amp;</i> |
|-------------------|---------------------|-----------------|----------------|---------|----------------------|
|                   | lac dom-<br>lac dom | lac dom-<br>div | div-lac<br>dom | div-div |                      |
| Negative-Negative | 0                   | 1               | 1              | 1       | <i>0.225</i>         |
| Negative-Positive | 2                   | 0               | 1              | 0       |                      |
| Positive-Negative | 4                   | 0               | 1              | 4       |                      |
| Positive-Positive | 13                  | 3               | 2              | 4       |                      |

& Fisher's Exact Test
